# Supplementary material
Source: PubMed Central journal article supplement (PMC5998116)

**Appendix S1.1** Site-specific description of field environmental characteristics of the AuCl experiment including various climate and soil variables.

|                                                                  | <b>Auclair</b><br>(QC, CAN)              | <b>Cloquet</b><br>(MN, USA)   |
|------------------------------------------------------------------|------------------------------------------|-------------------------------|
| Coordinates                                                      | 47.7° N, 68.6° W <sup>a</sup>            | 46.7° N, 92.5° W <sup>a</sup> |
| Altitude<br>(m)                                                  | 333 <sup>a</sup>                         | 383 <sup>a</sup>              |
| Former land use                                                  | Low-input abandoned pasture <sup>a</sup> | Forest <sup>a</sup>           |
| Mean annual temperature<br>(°C)                                  | 3.4 ± 5.5 <sup>b</sup>                   | 4.3 ± 5.5 <sup>c</sup>        |
| Mean annual precipitations<br>(mm/month)                         | 88.5 ± 20.8 <sup>b</sup>                 | 35.2 ± 19.7 <sup>c</sup>      |
| Soil type                                                        | Loam <sup>a</sup>                        | Sandy-loam <sup>a</sup>       |
| Mean litter layer height<br>(cm)                                 | 2.0 ± 0.6 <sup>d</sup>                   | 1.8 ± 0.7 <sup>d</sup>        |
| Mean soil temperature<br>(°C)                                    | NA                                       | 6.97 ± 4.19 <sup>e</sup>      |
| Mean soil moisture<br>(% H <sub>2</sub> O d.m.)                  | 19.5 ± 3.4 <sup>d</sup>                  | 10.6 ± 2.8 <sup>d</sup>       |
| Mean soil microbial biomass<br>(µg microbial-C g <sup>-1</sup> ) | 132.8 ± 22.6 <sup>d</sup>                | NA                            |
| Mean soil pH                                                     | 4.56 ± 0.14 <sup>f</sup>                 | 5.58 ± 0.15 <sup>g</sup>      |

<sup>a</sup> As described in Tobner *et al.* (2014) and TreeDivNet (2018)

<sup>b</sup> Calculated from average monthly data between 2005 to 2015 at Edmunston, NB, Canada (~ 44km from Auclair; Environment Canada)

<sup>c</sup> Calculated from average monthly data between 2005 to 2015 at Cloquet, MN, USA (Weather Underground)

<sup>d</sup> Method is explained in “Material and methods” section of the paper

<sup>e</sup> Calculated from average 2015 monthly data at Cloquet experimental site

<sup>f</sup> Measured with a water-based method on 12 samples taken across blocks in September 2017

<sup>g</sup> Measured with a water-based method on 64 samples taken across blocks in October 2013

**References :**

Tobner CM, Paquette A, Reich PB, Gravel D & Messier C. 2014 Advancing biodiversity–ecosystem functioning science using high-density tree-based experiments over functional diversity gradients. *Oecologia* **174**, 609-621.

TreeDivNet (2018). IDENT (Canada, USA, Germany, Italy). See <http://www.treedivnet.ugent.be/ExpIDENT.html> (accessed 21 February 2018).

**Appendix S1.2** Soil moisture (% H<sub>2</sub>O dry matter) and litter layer height (cm) by tree genus and site (Au = Auclair, Cl = Cloquet). Letters represent post-hoc Tukey results ( $p < 0.05$ ).

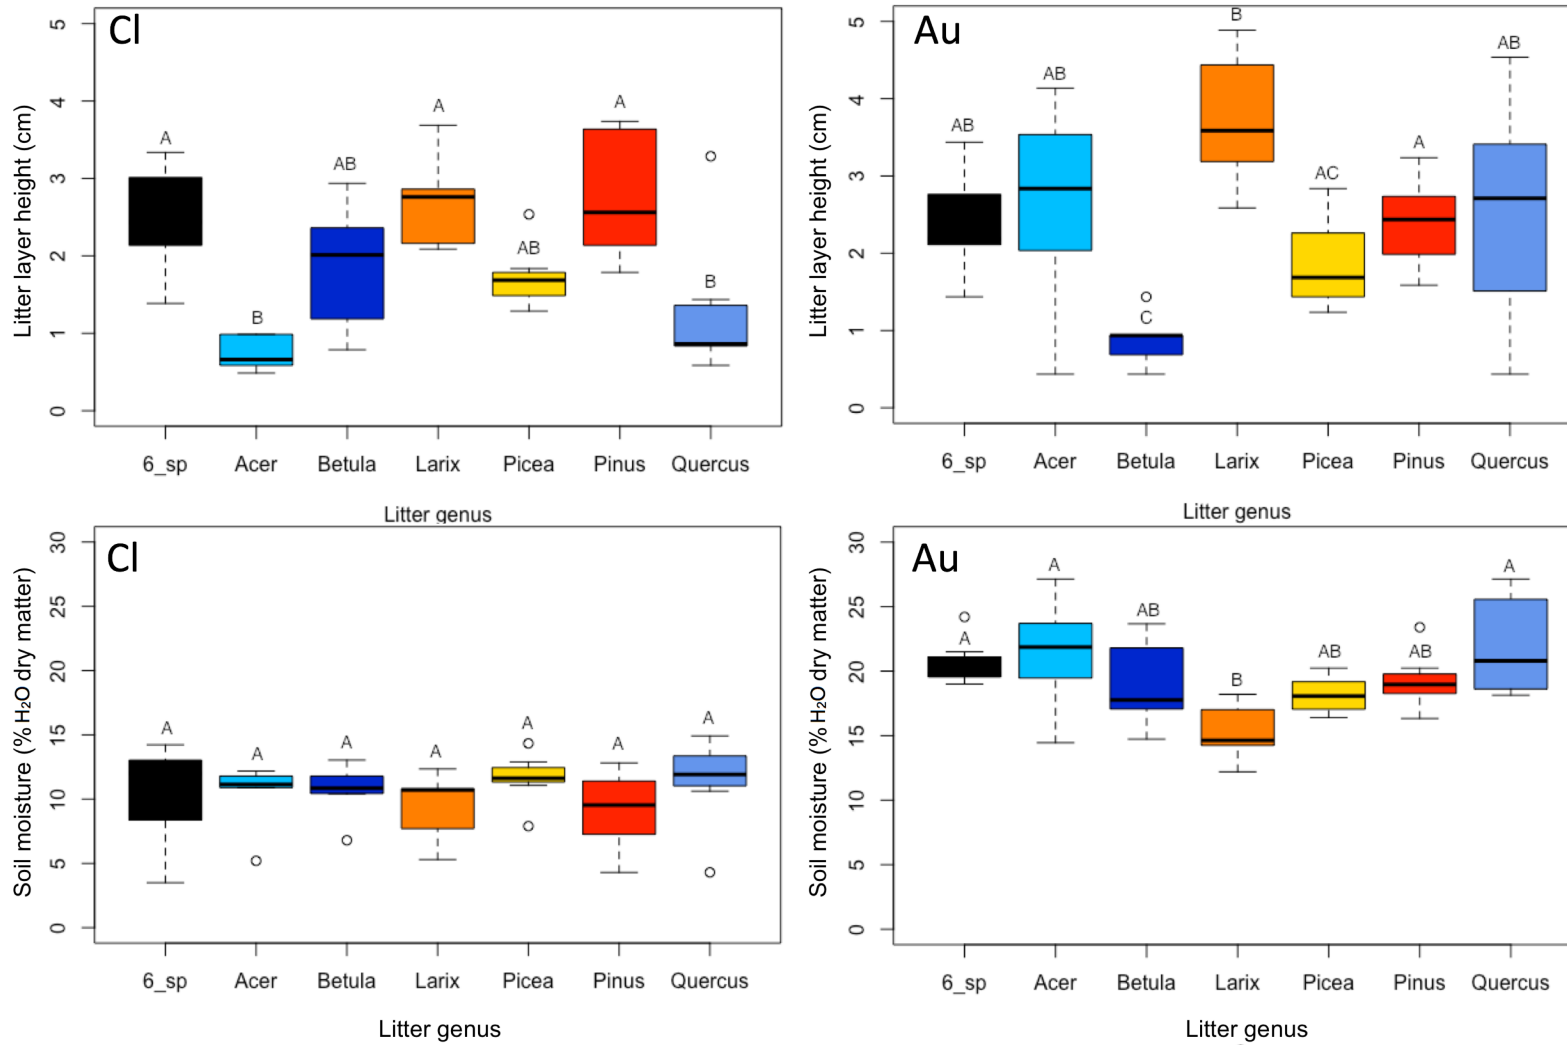

## Appendix S2.1 Functional trait measurement methods of leaf litter per tree species per site.

| Trait (units)                                                                           | Replication | Instrument and/or protocols                                                                                                                                                                                                                                                                                                                                                                                                                                             |
|-----------------------------------------------------------------------------------------|-------------|-------------------------------------------------------------------------------------------------------------------------------------------------------------------------------------------------------------------------------------------------------------------------------------------------------------------------------------------------------------------------------------------------------------------------------------------------------------------------|
| C and N concentration<br>(% dry-leaf mass)                                              | 3           | At least 5 leaves were pooled together to grind to a fine powder with a ball mill (Retsch). A replicate was a subset of this mixture. C and N concentrations were measured with an elementary analyzer EA1108 (Thermo Scientific).                                                                                                                                                                                                                                      |
| Hemicellulose, cellulose and lignin concentration<br>(% organic matter)                 | 1 to 3      | At least 5 leaves were pooled together to grind with a 1 mm cutter mill (Wiley). A replicate was a subset of this mixture. Hemicellulose, cellulose and lignin concentrations were obtained after a series of chemical digestions (NDF, ADF, ADL) with a Fiber Analyzer 2000 (Ankom). Organic matter was determined after ashing at 550°C during 5 hrs. More details in Van Soest <i>et al.</i> (1991). Number of replicates depended on available litter for analyses. |
| Water saturation capacity<br>(% H <sub>2</sub> O dry-leaf mass)                         | ≥ 10        | Based on this formula:<br>$(W - D) / (D) * 100$<br>Where:<br>D = Dried leaf mass after 48 hrs in oven at 65°C<br>W = Wet leaf mass after 48 hrs immersion in distilled water.<br><br>Adapted from the LDMC measurement protocol in Pérez-Harguindeguy <i>et al.</i> (2013).                                                                                                                                                                                             |
| Leaf thickness<br>(mm)                                                                  | ≥ 15        | Sub-replicates (3-5) were taken per leaf and at least 15 leaves were analyzed. Measured with a QuantuMike 293-180 digital micrometer (Mitotuyo). More details in Pérez-Harguindeguy <i>et al.</i> 2013.                                                                                                                                                                                                                                                                 |
| Leaf toughness or “resistance to fracture”<br>(g mm <sup>2</sup> <sup>-1</sup> )        | ≥ 15        | Sub-replicates (3-5) were taken per leaf and at least 15 leaves were analyzed. Measured with a Medio-Line 403000 pressure dynamometer (Pesola). More details in Pérez-Harguindeguy <i>et al.</i> (2013).                                                                                                                                                                                                                                                                |
| Microbial basal respiration<br>(μg CO <sub>2</sub> -C g <sup>-1</sup> h <sup>-1</sup> ) | 2 to 24     | Moisture content was adjusted at 45 % of water holding capacity after grinding (coffee mill) and sieving of all litter material (1 mm Retsch test sieve). To limit size heterogeneity, only litter pieces ≥ 0.6 mm were used (second sieving). Preincubation lasted 7 days at 25 °C. More details see Campbell <i>et al.</i> (2003). Number of replicates depended on available litter for analyses.                                                                    |

Campbell CD, Chapman SJ, Cameron CM, Davidson MS & Potts JM. 2003 A rapid microtiter plate method to measure carbon dioxide evolved from carbon substrate amendments so as to determine the physiological profiles of soil microbial communities by using whole soil. *Appl. Environ. Microbiol.* **69**, 3593-3599

Pérez-Harguindeguy N, Díaz S, Garnier E, Lavorel S, Poorter H, Jaureguiberry P *et al.* 2013. New handbook for standardised measurement of plant functional traits worldwide. *Aust. J. Bot.* **61**, 167-234

Van Soest PV, Robertson JB & Lewis BA. 1991 Methods for dietary fiber, neutral detergent fiber, and nonstarch polysaccharides in relation to animal nutrition. *J. Dairy Sci.* **74**, 3583-3597.

**Appendix S2.2** Mean litter trait values and standard deviation for the 12 tree species of Auclair (Au) and Cloquet (Cl). NA= North American origin (native), EU = European species (non-native), o.m. = organic matter and d.m. = dry matter. See Appendix 2 for number of replicates and methodology associated.

| Species               | Origin | Site | Thickness<br>mm | Resistance<br>g mm <sup>-2</sup> | WSC<br>% H <sub>2</sub> O d.m. | N<br>% d.m. | C/N           | Cellulose<br>% o.m. | Hemicellulose<br>% o.m. | Lignin<br>% o.m. | Lignin/N | MR<br>µg CO <sub>2</sub> -C g <sup>-1</sup> h <sup>-1</sup> |
|-----------------------|--------|------|-----------------|----------------------------------|--------------------------------|-------------|---------------|---------------------|-------------------------|------------------|----------|-------------------------------------------------------------|
| <i>A. saccharum</i>   | NA     | Au   | 0.095 ± 0.01    | 4 ± 1                            | 377.651 ± 33.606               | 0.98 ± 0.01 | 45.53 ± 0.09  | 33.1 ± 0.53         | 3.75 ± 0.27             | 12.47 ± 0.47     | 12.72    | 21.029 ± 5.946                                              |
| <i>A. platanoides</i> | EU     | Au   | 0.077 ± 0.009   | 3 ± 1                            | 383.51 ± 19.926                | 0.92 ± 0.02 | 48.68 ± 1.01  | 39.3 ± 1.72         | 15.94 ± 1.18            | 9.99 ± 0.29      | 10.86    | 28.769 ± 2.563                                              |
| <i>A. saccharum</i>   | NA     | Cl   | 0.135 ± 0.007   | 5 ± 1                            | 232.783 ± 17.067               | 0.91 ± 0.03 | 49.18 ± 1.3   | 26.54 ± 0.44        | 4.38 ± 0.1              | 12.12 ± 0.27     | 13.32    | 55.024 ± 9.747                                              |
| <i>A. platanoides</i> | EU     | Cl   | 0.115 ± 0.01    | 4 ± 1                            | 237.533 ± 21.114               | 1.62 ± 0.02 | 27.5 ± 0.26   | 31.65 ± 1.23        | 7.48 ± 1.81             | 14.64 ± 0.47     | 9.04     | 86.328 ± 15.096                                             |
| <i>B. papyrifera</i>  | NA     | Au   | 0.117 ± 0.012   | 3 ± 1                            | 367.94 ± 27.023                | 1.38 ± 0.01 | 33.76 ± 0.08  | 31.32 ± 0.65        | 4.81 ± 1.02             | 16.7 ± 2.56      | 12.1     | 53.394 ± 1.396                                              |
| <i>B. pendula</i>     | EU     | Au   | 0.13 ± 0.009    | 2 ± 1                            | 384.723 ± 36.062               | 0.93 ± 0.01 | 49.98 ± 0.45  | 33.39 ± 0.1         | 12.38 ± 1.67            | 12.45 ± 1.1      | 13.39    | 34.69 ± 0.817                                               |
| <i>B. papyrifera</i>  | NA     | Cl   | 0.152 ± 0.015   | 3 ± 3                            | 352.124 ± 30.811               | 1.07 ± 0.01 | 44.09 ± 0.26  | 25.11 ± 0.43        | 7.8 ± 0.84              | 14.75 ± 0.5      | 13.79    | 69.054 ± 15.836                                             |
| <i>B. pendula</i>     | EU     | Cl   | 0.138 ± 0.012   | 2 ± 1                            | 398.826 ± 20.641               | 0.73 ± 0.02 | 64.59 ± 1.47  | 33.27 ± 1.03        | 5.13 ± 0.27             | 13.98 ± 0.58     | 19.15    | 56.422 ± 18.98                                              |
| <i>Q. rubra</i>       | NA     | Au   | 0.12 ± 0.007    | 7 ± 1                            | 289.602 ± 38.462               | 0.92 ± 0.01 | 51.41 ± 0.16  | 42.64 ± 0.62        | 10.46 ± 0.61            | 16.17 ± 0.66     | 17.58    | 38.669 ± 10.649                                             |
| <i>Q. robur</i>       | EU     | Au   | 0.117 ± 0.007   | 6 ± 1                            | 286.161 ± 24.788               | 0.93 ± 0.01 | 49.56 ± 0.14  | 43.14 ± 0.35        | 2.23 ± 0.41             | 16.03 ± 1.89     | 17.24    | 24.076 ± 1.064                                              |
| <i>Q. rubra</i>       | NA     | Cl   | 0.141 ± 0.01    | 5 ± 1                            | 244.33 ± 21.924                | 0.87 ± 0.02 | 51.6 ± 1.28   | 39.93 ± 0.39        | 8.63 ± 0.96             | 17.1 ± 0.13      | 19.66    | 82.512 ± 14.596                                             |
| <i>Q. robur</i>       | EU     | Cl   | 0.154 ± 0.01    | 4 ± 1                            | 282.001 ± 24.14                | 1.04 ± 0.01 | 42.29 ± 0.31  | 39.67 ± 0.39        | 1.88 ± 0.1              | 14.72 ± 0.3      | 14.15    | 67.918 ± 12.707                                             |
| <i>L. laricina</i>    | NA     | Au   | 0.071 ± 0.18    | 2 ± 1                            | 192.642 ± 16.773               | 1.85 ± 0.01 | 26.72 ± 0.13  | 42.19 ± 0.44        | 2.44 ± 0.09             | 24.77 ± 0.07     | 13.39    | 26.085 ± 2.21                                               |
| <i>L. decidua</i>     | EU     | Au   | 0.088 ± 0.021   | 2 ± 1                            | 218.937 ± 25.81                | 2.46 ± 0    | 19.81 ± 0.02  | 36.6                | 0                       | 34.62            | 14.07    | 25.362 ± 5.717                                              |
| <i>L. laricina</i>    | NA     | Cl   | 0.137 ± 0.017   | 3 ± 1                            | 251.538 ± 51.215               | 0.92 ± 0.05 | 48.17 ± 2.45  | 35.78 ± 0.35        | 3.6 ± 0.68              | 26.71 ± 0.25     | 29.03    | 60.376 ± 15.654                                             |
| <i>L. decidua</i>     | EU     | Cl   | 0.128 ± 0.012   | 2 ± 1                            | 255.903 ± 35.845               | 0.48 ± 0.02 | 99.74 ± 2.98  | 39.05 ± 0.61        | 0.45 ± 0.31             | 26.65 ± 0.27     | 55.52    | 77.549 ± 20.763                                             |
| <i>P. glauca</i>      | NA     | Au   | 0.273 ± 0.46    | 16 ± 5                           | 148.521 ± 7.605                | 1 ± 0.01    | 47.42 ± 0.17  | 38.86 ± 1.21        | 2.91 ± 0.17             | 22.85 ± 1.38     | 22.85    | 22.478 ± 2.558                                              |
| <i>P. abies</i>       | EU     | Au   | 0.201 ± 0.031   | 17 ± 5                           | 138.212 ± 7.301                | 1.2 ± 0.01  | 39.17 ± 0.02  | 44.9 ± 0.80         | 4.17 ± 0.29             | 22.61 ± 0.44     | 18.84    | 20.329 ± 0.787                                              |
| <i>P. glauca</i>      | NA     | Cl   | 0.284 ± 0.05    | 17 ± 6                           | 164.594 ± 27.208               | 0.6 ± 0.01  | 77.96 ± 0.88  | 35.39 ± 0.32        | 4.53 ± 0.42             | 20.65 ± 0.16     | 34.42    | 55.815 ± 20.055                                             |
| <i>P. abies</i>       | EU     | Cl   | 0.239 ± 0.02    | 10 ± 2                           | 200.053 ± 28.256               | 0.64 ± 0.01 | 73.35 ± 0.46  | 39.75 ± 1.36        | 1.86 ± 1.15             | 22.23 ± 0.23     | 34.73    | 41.164 ± 6.73                                               |
| <i>P. strobus</i>     | NA     | Au   | 0.232 ± 0.034   | 17 ± 5                           | 115.494 ± 12.491               | 1.41 ± 0.01 | 34.69 ± 0.13  | 35.63 ± 0.47        | 2.62 ± 0.45             | 25.94 ± 0.18     | 18.4     | 18.983 ± 2.474                                              |
| <i>P. sylvestris</i>  | EU     | Au   | 0.477 ± 0.078   | 43 ± 15                          | 85.399 ± 9.752                 | 0.97 ± 0.01 | 50.05 ± 0.18  | 47.96 ± 0.84        | 2.59 ± 0.3              | 21.6 ± 0.73      | 22.27    | 15.308 ± 2.322                                              |
| <i>P. strobus</i>     | NA     | Cl   | 0.223 ± 0.04    | 11 ± 3                           | 113.201 ± 10.447               | 0.38 ± 0.02 | 131.75 ± 6.95 | 37.51 ± 0.59        | 0.93 ± 0.39             | 26.26 ± 0.18     | 69.11    | 42.054 ± 7.835                                              |
| <i>P. sylvestris</i>  | EU     | Cl   | 0.497 ± 0.056   | 50 ± 17                          | 166.069 ± 17.693               | 0.55 ± 0.03 | 88.6 ± 4.45   | 42.8 ± 0.08         | 1.73 ± 0.27             | 19.77 ± 0.11     | 35.95    | 40.885 ± 8.294                                              |

**Appendix S3** List of 57 springtail species sampled by study site in AuCl experiment. Individuals not matching with any species described in the available taxonomic keys were classed in “morpho-species” based on morphologic characteristics (e.g. *Arrhopalites* sp. 1) \*Excluded from analyses.

| Family          | Study site                          |                                    |                                |
|-----------------|-------------------------------------|------------------------------------|--------------------------------|
|                 | Auclair (n=37)                      | Cloquet (n=34)                     | Shared species (n=14)          |
| Arrhopalitidae  | <i>Arrhopalites</i> sp.1            |                                    |                                |
| Bourletiellidae | <i>Bourletiella hortensis</i>       | <i>Bourletiella hortensis</i>      | <i>Bourletiella hortensis</i>  |
| Dicyrtomidae    |                                     | <i>Dicyrtoma fusca</i>             |                                |
| Entomobryidae   | <i>Corynothrix borealis</i>         | <i>Entomobrya</i> sp.2             | <i>Entomobrya</i> sp.2         |
|                 | <i>Entomobrya</i> sp.1              | <i>Entomobrya comparata</i>        | <i>Entomobrya nivalis</i>      |
|                 | <i>Entomobrya</i> sp.2              | <i>Entomobrya nivalis</i>          | <i>Lepidocyrtus cyaneus</i>    |
|                 | <i>Entomobrya</i> sp.3              | <i>Heteromurus nitidus</i>         | <i>Lepidocyrtus fernandi</i>   |
|                 | <i>Entomobrya</i> sp.4              | <i>Lepidocyrtus cyaneus</i>        |                                |
|                 | <i>Entomobrya nivalis</i>           | <i>Lepidocyrtus fernandi</i>       |                                |
|                 | <i>Lepidocyrtus beaucatcheri</i>    | <i>Lepidocyrtus paradoxus</i>      |                                |
|                 | <i>Lepidocyrtus cyaneus</i>         | <i>Lepidocyrtus violaceus</i>      |                                |
|                 | <i>Lepidocyrtus fernandi</i>        | <i>Lepidocyrtus</i> sp.1           |                                |
|                 | <i>Pseudosinella alba</i>           | <i>Pseudosinella rolfsi</i>        |                                |
|                 | <i>Sinella</i> sp.1                 |                                    |                                |
| Isotomidae      | <i>Desoria flora</i>                | <i>Desoria</i> sp.1                | <i>Desoria flora</i>           |
|                 | <i>Desoria trispinata</i>           | <i>Desoria flora</i>               | <i>Isotoma subviridis</i>      |
|                 | <i>Folsomia</i> sp.1                | <i>Folsomia bisetosa</i>           | <i>Isotoma viridis</i>         |
|                 | <i>Folsomia stella</i>              | <i>Folsomia fimetaria</i>          | <i>Isotomiella minor</i>       |
|                 | <i>Isotoma subviridis</i>           | <i>Isotoma subviridis</i>          | <i>Parisotoma notabilis</i>    |
|                 | <i>Isotoma viridis</i>              | <i>Isotoma viridis</i>             |                                |
|                 | <i>Isotomiella minor</i>            | <i>Isotomiella minor</i>           |                                |
|                 | <i>Parisotoma notabilis</i>         | <i>Parisotoma notabilis</i>        |                                |
|                 |                                     | <i>Pseudanurophorus arcticus</i>   |                                |
| Hypogastruridae | <i>Schaeffaria duodecimocellata</i> | <i>Choreutinula americana</i>      |                                |
|                 | <i>Willemia intermedia</i>          | <i>Hypogastrura</i> sp.1           |                                |
|                 |                                     | <i>Willemia duodecimocellata</i>   |                                |
| Katiannidae     | <i>Sminthurinus conchylatus</i>     | <i>Polykatianna intermedia</i>     |                                |
| Neanuridae      | <i>Friesea mirabilis</i>            | <i>Micranurida pygmaea</i>         | <i>Neanura muscorum</i>        |
|                 | <i>Neanura muscorum</i>             | <i>Neanura muscorum</i>            |                                |
| Neelidae        | <i>Megalothorax minimus*</i>        |                                    |                                |
| Onychiuridae    | <i>Hymenaphorura similis</i>        | <i>Hymenaphorura similis</i>       | <i>Hymenaphorura similis</i>   |
|                 | <i>Onychiurus</i> sp.1              | <i>Oligaphorura pingicola</i>      |                                |
|                 | <i>Proisotoma immersa</i>           | <i>Thalassophorura parvicornis</i> |                                |
|                 | <i>Proisotoma minima</i>            |                                    |                                |
|                 | <i>Protaphorura armata</i>          |                                    |                                |
|                 | <i>Protaphorura paucisetosa</i>     |                                    |                                |
| Sminthurididae  |                                     | <i>Sminthurides lepus</i>          |                                |
| Sminthuridae    | <i>Sminthurus</i> sp.1              |                                    |                                |
| Tomoceridae     |                                     | <i>Pogonognathellus flavescens</i> |                                |
| Tullbergiidae   | <i>Ameritulla clavata</i>           | <i>Mesaphorura macrochaeta</i>     | <i>Mesaphorura macrochaeta</i> |
|                 | <i>Mesaphorura macrochaeta</i>      | <i>Mesaphorura silvicola</i>       | <i>Mesaphorura silvicola</i>   |
|                 | <i>Mesaphorura silvicola</i>        |                                    |                                |
|                 | <i>Mesaphorura simplex</i>          |                                    |                                |

**Appendix S4** Procrustes correlation between springtail species (blue) and litter traits (red) of Cloquet single-species treatments (0.4,  $p < 0.01$ ). Permutations = 9999. Prior to analyses, species abundances were Hellinger-transformed and litter traits were standardized. Auclair is not represented as no significant correlation was observed (0.3,  $p > 0.05$ ), thus graphical representation meaningless for this study site.

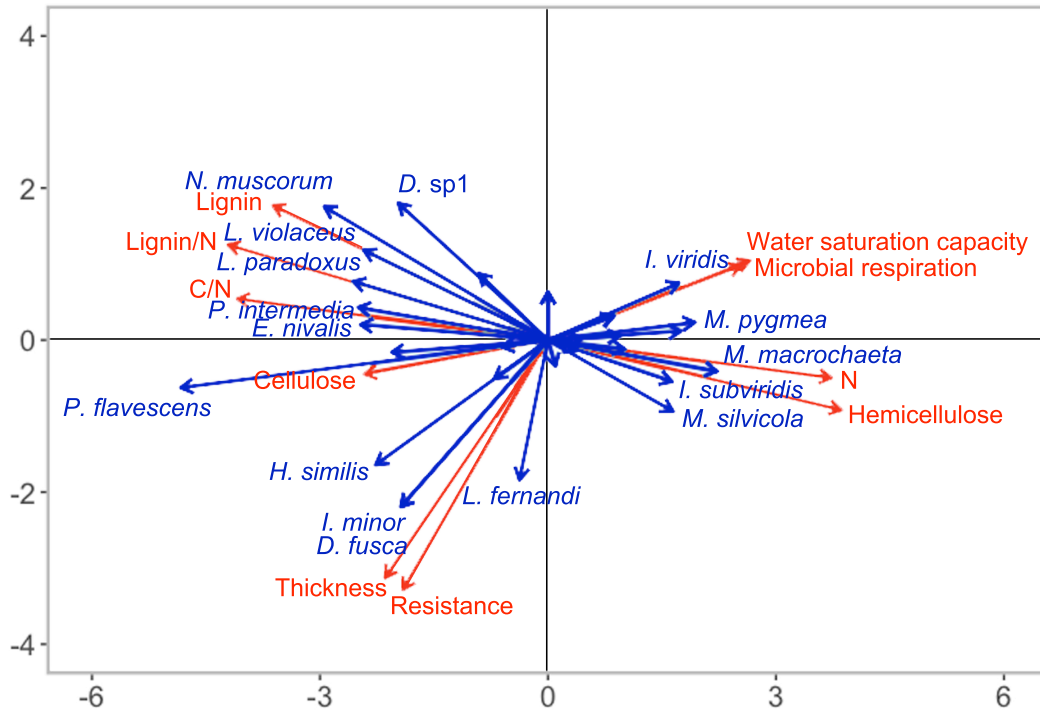

Supplement: rspb20180647supp1.pdf [file rspb20180647supp1.pdf]
